# Supplementary material for: Nanofiltration Membranes Formed through Interfacial Polymerization Involving Cycloalkane Amine Monomer and Trimesoyl Chloride Showing Some Tolerance to Chlorine during Dye Desalination
Source: MDPI journal article supplement (doi:10.3390/membranes12030333), 2022-03-17
Supplement: s1 [file s1]

Supplementary Material for

# Nanofiltration Membranes Formed through Interfacial Polymerization Involving Cycloalkane Amine Monomer and Trimesoyl Chloride Showing Some Tolerance to Chlorine during Dye Desalination

Micah Belle Marie Yap Ang <sup>1,\*</sup>, Yi-Ling Wu <sup>1</sup>, Min-Yi Chu <sup>1</sup>, Ping-Han Wu <sup>1</sup>, Yu-Hsuan Chiao <sup>1,2</sup>, Jeremiah C. Millare <sup>3</sup>, Shu-Hsien Huang <sup>1,4,\*</sup>, Hui-An Tsai <sup>1</sup> and Kueir-Rarn Lee <sup>1,5,\*</sup>

<sup>1</sup> R&D Center for Membrane Technology and Department of Chemical Engineering, Chung Yuan Christian University, Taoyuan 32023, Taiwan; yiling890510@gmail.com (Y.-L.W.); chuminyi1029@gmail.com (M.-Y.C.); pinghanwu@cycu.org.tw (P.-H.W.); huian@cycu.edu.tw (H.-A.T.)

<sup>2</sup> Research Center for Membrane and Film Technology, Department of Chemical Science and Engineering, Kobe University, Rokkodaicho 1-1, Nada, Kobe 657-8501, Japan; msdonaldc@hotmail.com (Y.-H.C.);

<sup>3</sup> School of Chemical, Biological, and Materials Engineering and Sciences, Mapúa University, Manila 1002, Philippines; jcmillare@mapua.edu.ph (J.C.M.)

<sup>4</sup> Department of Chemical and Materials Engineering, National Ilan University, Yilan 26047, Taiwan

<sup>5</sup> Research Center for Circular Economy, Chung Yuan Christian University, Taoyuan 32023, Taiwan

\* Correspondence: mbmyang@gmail.com (M.B.M.Y.A.); huangsh@niu.edu.tw (S.-H.H.); krllee@cycu.edu.tw (K.-R.L.)

**NF90**

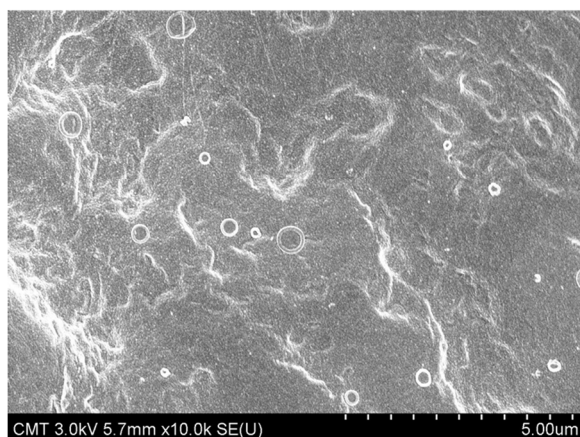

**NF270**

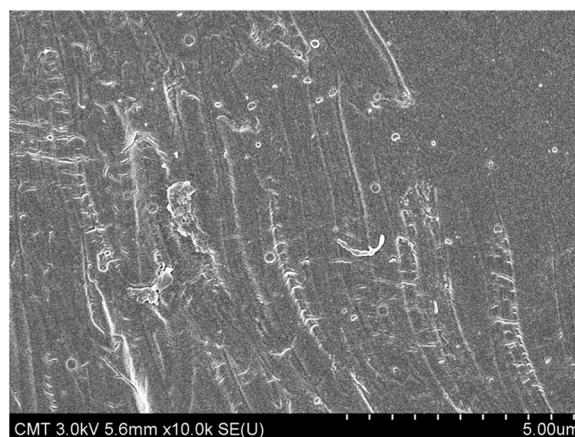

**Figure S1.** FESEM images of commercial membranes.

**Adsorption study:**

The adsorption study was followed from this work [1], but modified by contacting only the surface of the membrane with the dye solution. Briefly, wet membranes were clamped in a self-made vessel. Afterwards, 50 mL of 50 ppm brilliant blue R was poured into the vessel. The vessel was placed in the shaker at 100 rpm. The concentration of the dye in the vessel was measured at time  $t$ , using ultraviolet-visible spectroscopy, UV/Vis, Bio-Tek Instruments Inc., Winooski, USA.

1. B.M. Thamer, A. Aldalbahi, M. Moydeen A, H. El-Hamshary, A.M. Al-Enizi, M.H. El-Newehy, Effective adsorption of Coomassie brilliant blue dye using poly(phenylene diamine)grafted electrospun carbon nanofibers as a novel adsorbent, Mater. Chem. Phys. 234 (2019) 133-145. <https://doi.org/10.1016/j.matchemphys.2019.05.087>.
